# Supplementary material
Source: bioRxiv or medRxiv preprint supplement (https://www.biorxiv.org/highwire/filestream/62242/field_highwire_adjunct_files/10/130948-9.pdf)
Supplement: Supplementary file [file 130948-9.pdf]

| <b>Name</b>                  | <b>Cell Definitions</b>              |
|------------------------------|--------------------------------------|
| B cells                      | CD19+   CD20+                        |
| CD16- monocytes              | CD14+   CD33+   CD16-                |
| CD16+ monocytes              | CD14+   CD33+   CD16+                |
| CD4+ T cells                 | CD3+   CD4+                          |
| CD8+ T cells                 | CD3+   CD8+                          |
| central memory CD4+ T cells  | CD3+   CD4+   CCR7+   CD45RA-        |
| central memory CD8+ T cells  | CD3+   CD8+   CCR7+   CD45RA-        |
| effector CD4+ T cells        | CD3+   CD4+   CCR7-   CD45RA+        |
| effector CD8+ T cells        | CD3+   CD8+   CCR7-   CD45RA+        |
| effector memory CD4+ T cells | CD3+   CD4+   CCR7-   CD45RA-        |
| effector memory CD8+ T cells | CD3+   CD8+   CCR7-   CD45RA-        |
| gamma-delta T cells          | TCRgd+                               |
| memory B cells               | CD3-   CD19+   CD20+   CD24+   CD38- |
| monocytes                    | CD14+   CD33+                        |
| naive B cells                | CD3-   CD19+   CD20+   CD24-   CD38+ |
| naive CD4+ T cells           | CD3+   CD4+   CCR7+   CD45RA+        |
| naive CD8+ T cells           | CD3+   CD8+   CCR7+   CD45RA+        |
| NK cells                     | CD3-   CD16+   CD56+                 |
| NKT cells                    | CD3+   CD56+                         |
| plasmablasts                 | CD3-   CD20-   CD27+   CD38+         |
| T cells                      | CD3+                                 |
| transitional B cells         | CD3-   CD19+   CD20+   CD24+   CD38+ |
| Tregs                        | CD3+   CD4+   CD25+   CD127-         |

Supplementary Table 4: A list of cell definitions used to identify the 23 cell populations in all 10 studies included in the meta-analysis.
